# Supplementary material
Source: Springer Nature journal article supplement (https://www.springermedizin.de/resource/supplementary/13053_2008_132_MOESM1_ESM.pdf/9674298)

### A. LFS family, c.1100delC

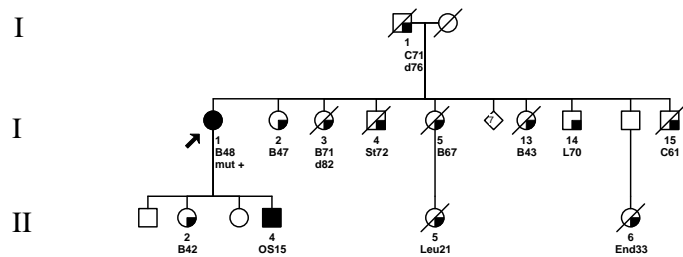

### B. LFL family, c.1100delC

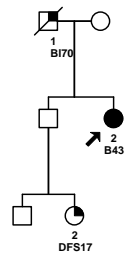

### C. LFS-suggestive family, c.1100delC

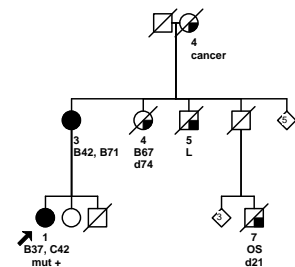

### D. LFS-suggestive family, c.1100delC

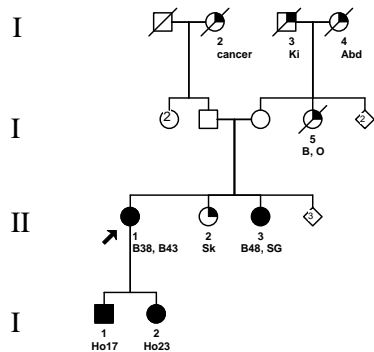

### E. LFL family, p.Phe328Ser

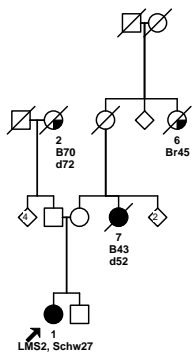

### F. LFL family, c.1096-?\_1629+?del

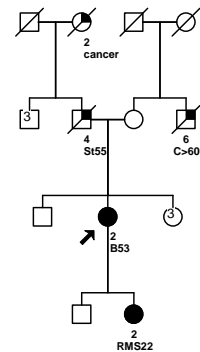

Supplement: MOESM1 [file 9674298]
